# Supplementary material for: Chemical labelling of active serum thioester proteins for quantification
Source: PubMed Central journal article supplement (PMC3274692; doi:10.1016/j.imbio.2011.07.021), 2012-02
Supplement: mmc1.pdf [file mmc1.pdf]

## Supporting information

### Chemical labelling of active serum thioester proteins for quantification.

Lotta Holm, Gareth L. Ackland, Mark R. Edwards, Ross A. Breckenridge, Robert B. Sim and John Offer.

#### Supporting Figure 1:

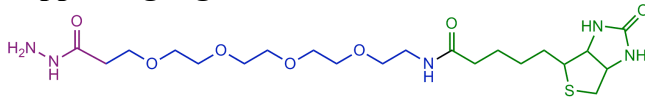

Chemical structure of thioester reactive probe: biotin-dPEG<sub>4</sub>-hydrazide (Celares)

#### Supporting Figure 2:

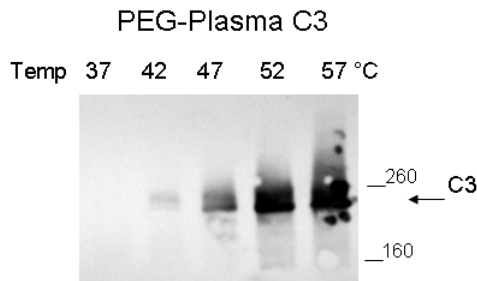

#### Supporting Figure 2:

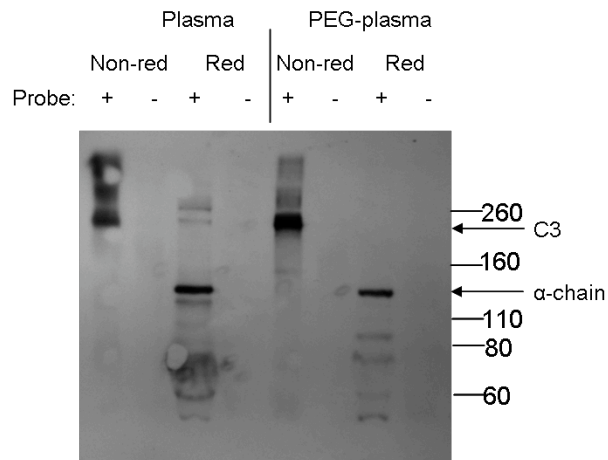

## Supporting Material and Methods:

### *Peptide Mass Fingerprinting*

MALDI-MS raw spectra for mass fingerprinting were processed using BioTools (Bruker Daltonics, MA). Data were processed using the smoothing algorithm SavitzkyGolay, baseline subtractions by the TopHat algorithm and peaks were centred at 80% peak high

Excision iv)

It could not be conclusively established which of the particular C4 isoforms (C4A, C4B or both) were present in this donor due to their extremely high sequence identity.

There is an extremely high sequence similarity between the two C4 isoforms (CO4A\_HUMAN vs CO4B\_HUMAN) in humans. A blast search was performed to find the positions of isoform unique amino acids and further compared peptide containing a unique site were identified in the MALDI-TOF experiment. There were no peptides from CO4A\_HUMAN found in a sequence unique area. There was only one unique peptide from CO4B\_HUMAN found but would need LC-MS-MS to satisfactorily characterise and identify peptides.

### Supporting Figure 3:

**Peptide coverage of identified peptides for excision i-iv, vi.**

#### Excision i)

Match to: **A2MG\_HUMAN** Score: 207 Expect: **4e-17**

**Alpha-2-macroglobulin OS=Homo sapiens GN=A2M PE=1 SV=3**

Nominal mass ( $M_r$ ): **164613**; Calculated pI value: **6.03**

NCBI BLAST search of [A2MG\\_HUMAN](#) against nr

Unformatted [sequence string](#) for pasting into other applications

Taxonomy: [Homo sapiens](#)

Fixed modifications: Carbamidomethyl (C)

Variable modifications: Oxidation (M)

Cleavage by Trypsin: cuts C-term side of KR unless next residue is P

Number of mass values searched: **100**

Number of mass values matched: **40**

Sequence Coverage: **38%**

Matched peptides shown in **Bold Red**

```
1  MGKNKLLHPS  LVLLLLVLLP  TDASVSGKPQ  YMVLVPSLLH  TETTEKGCVL
51  LSYLNETVTV  SASLESVRGN  RSLFTDLEAE  NDVLHCVAFA  VPKSSSNEEV
101 MFLTQVKGK  TQEFKKRTTV  MVKNEDSLVF  VQTDKSIYKP  GQTVKFRVVS
151 MDENFHPLNE  LIPLVYIQDP  KGNRIAQWQS  FQLEGGLKQF  SFPLSSEPFQ
201 GSYKVVVQKK  SGGRTEHPFT  VEEFVLPKFE  VQVTVPKIIT  ILEEEMNVSV
251  CGLYTYGKPV  PGHVTVSICR  KYSDASDCHG  EDSQAFCEKF  SGQLNSHGCF
301 YQQVTKVFQ  LKRKEYEMKL  HTEAQIQEEG  TVVELTGRQS  SEITRTITKL
351  SFVKVDSHFR  QGIPFFGQVR  LVDGKGVPIP  NKVIFIRGNE  ANYYSNATTD
401  EHGLVQFSIN  TTNVMGTSLT  VRVNYKDRSP  CYGYQWVSEE  HEEAHTAYL
451 VFSPSKSFVH  LEPMSHELPC  GHTQTVQAHY  ILNGGTLGLL  KKLSFYLLIM
501 AKGGIVRTGT  HGLLVKQEDM  KGHFSISIPV  KSDIAPVARL  LIYAVLPTGD
551 VIGDSAKYDV  ENCLANKVDL  SFSPSQSLPA  SHAHLRVTAA  PQSVCALRAV
601  DQSVLLMKPD  AELSASSVYN  LLPEKDLTGF  PGPLNDQDNE  DCINRHNVII
651 NGITYTPVSS  TNEKDMYSFL  EDMGLKAFTN  SKIRKPKMCP  QLQQYEMHGP
701  EGLRVGFYES  DVMGRGHARL  VHVEEPHTET  VRKYFPETWI  WDLVVVNSAG
```

751 VAEVGVTPVD TIT~~EWK~~**AGAF** **CL**SEDA**GLGI** **SSTASL**RAFQ **PF**FVELT**MPY**  
 801 **SVIR**GEAFTL KATVNLN**YLPK** CIR**VSVQ**LEA **SPAFLAVP**VE **KE**QAPHCICA  
 851 NGRQTVSWAV TPKSLGNVNF TVSAEALESQ ELCGTEVPSV PEHGRK**DTVI**  
 901 **KPLLVE**PEGL EK**ETTF**N**SLL** CP**SGGEV**SEE LSLK**LPPNVV** EESARASVSV  
 951 LGDILGSAMQ NTQNL**LQMPY** GCGEQNMVLF APNIYVLDYL NETQQLT**PEI**  
 1001 **KSKAIG**YLN**T** GYQRQLNYKH YDGS**YSTFGE** RYGR**NQGN**TW **LTA**FVL**KTF**A  
 1051 QARAYIFIDE AHITQAL**IWL** SQRQK**DNGCF** R**SSG**SLL**NNA** IKGGVEDEVT  
 1101 LSAYIT**IALL** EIPLTVTHPV VR**NALF**C**LES** **AWK**TAQEGDH GSHVY**T**K**ALL**  
 1151 **AYAFAL**AGNQ **DKR**KEVLKSL NEEAVK**KDNS** **VH**WERP**QKPK** APVGHFYEPQ  
 1201 APSAEVEMTS YVLLAYLTAQ PAPT**SED**LTS ATNIVK**WITK** **QQNA**QGG**FSS**  
 1251 **TQDTV**VALHA **LSKY**GAATFT RT**GKAAQ**VTI **QSSG**TFSS**KF** QVDNN**N**RL**LL**  
 1301 **QQVSL**PELPG EYS**MK**VTGEG CVYLQ**T**SLKY **NIL**PEKE**EF**P **FAL**GVQ**T**LPQ  
 1351 **TCDEP**KAHTS **FQIS**LSVSYT **GSR**SAN**MAI** **VD**VKM**VSG**FI **PL**KPT**V**K**M**LE  
 1401 RSNHVS**RTEV** SS**NH**VLIYLD **KVS**NQ**TLSL**F **FT**VLQ**D**VP**V**R DLKPA**I**V**K**VY  
 1451 **DYYET**DEF**AI** **AEYN**AP**CSK**D LGNA

## Excision ii)

Match to: **A2MG\_HUMAN** Score: 71 Expect: 0.0016

**Alpha-2-macroglobulin OS=Homo sapiens GN=A2M PE=1 SV=3**

Nominal mass (M<sub>r</sub>): 164613; Calculated pI value: 6.03

NCBI BLAST search of [A2MG\\_HUMAN](#) against nr

Unformatted [sequence string](#) for pasting into other applications

Taxonomy: [Homo sapiens](#)

Fixed modifications: Carbamidomethyl (C)

Variable modifications: Oxidation (M)

Cleavage by Trypsin: cuts C-term side of KR unless next residue is P

Number of mass values searched: 100

Number of mass values matched: 20

Sequence Coverage: 24%

Matched peptides shown in **Bold Red**

1 MGK**N**KL**LHPS** LV**LL**LLV**LLP** TDASVSG**KPQ** Y**M**VLVPS**LLH** TETTEK**GC**VL  
 51 LS**Y**LN**ET**VT**V** SASLESV**RGN** **RSL**F**T**D**L**E**A**E **ND**VL**H**C**V**A**F**A **V**P**K**SS**S**N**E**E**V**  
 101 M**F**LT**V**Q**V**K**GP** T**Q**E**F**K**R**RT**V** M**V**K**N**E**D**S**L**V**F** V**Q**T**D**K**S**I**Y**K**P** G**Q**T**V**K**F**R**V**V**S**  
 151 **M**D**E**N**F**H**P**L**N**E **L**I**P**L**V**Y**I**Q**D**P **K**G**N**R**I**A**Q**W**Q**S **F**Q**L**E**G**G**L**K**Q**F **S**F**P**L**S**S**E**P**F**Q  
 201 G**S**Y**K**V**V**V**Q**K **S**G**G**R**T**E**H**P**F**T **V**E**E**F**V**L**P**K**F**E **V**Q**V**T**V**P**K**I**I**T **I**L**E**E**E**M**N**V**S**V  
 251 C**G**L**Y**T**Y**G**K**P**V** P**G**H**V**T**V**S**I**C**R** K**Y**S**D**A**S**D**C**H**G** E**D**S**Q**A**F**C**E**K**F** **S**G**Q**L**N**S**H**G**C**F  
 301 **Y**Q**Q**V**K**T**K**V**F**Q **L**K**R**K**E**Y**E**M**K**L **H**T**E**A**Q**I**Q**E**E**G **T**V**V**E**L**T**G**R**Q**S **S**E**I**T**R**I**T**I**T**K**L**  
 351 **S**F**V**K**V**D**S**H**R** **Q**G**I**P**F**F**G**Q**V**R **L**V**D**G**K**G**V**P**I**P **N**K**V**I**F**I**R**G**N**E **A**N**Y**S**N**A**T**T**D**  
 401 E**H**G**L**V**Q**F**S**I**N** **T**T**N**V**M**G**T**S**L**T **V**R**V**N**Y**K**D**R**S**P **C**Y**G**Y**Q**W**S**E**E** **H**E**E**A**H**H**T**A**Y**L  
 451 **V**F**S**P**S**K**S**F**V**H **L**E**P**S**M**S**H**E**L**P**C** **G**H**T**Q**T**V**Q**A**H**Y **I**L**N**G**G**T**L**L**G**L **K**K**L**S**F**Y**L**I**M**  
 501 A**K**G**G**I**V**R**T**G**T** **H**G**L**L**V**K**Q**E**D**M **K**G**H**F**S**I**S**I**P**V **K**S**D**I**A**P**V**A**R**L **L**I**Y**A**V**L**P**T**G**D  
 551 **V**I**G**D**S**A**K****Y**D**V** **E**N**C**L**A**N**K**V**D**L **S**F**S**P**S**Q**S**L**P**A **S**H**A**H**L**R**V**T**A**A **P**Q**S**V**C**A**L**R**A**V  
 601 D**Q**S**V**L**L**M**K**P**D** A**E**L**S**A**S**S**V**Y**N** **L**L**P**E**K**D**L**T**G**F **P**G**P**L**N**D**Q**D**N**E **D**C**I**N**R**H**N**V**Y**I  
 651 N**G**I**T**Y**T**P**V**S**S** **T**N**E**K**D**M**S**F**L** **E**D**M**G**L**K**A**F**T**N **S**K**I**R**K**P**K****M**C**P** **Q**L**Q**Y**E**M**H**G**P**  
 701 **E**G**L**R**V**G**F**Y**S** **D**V**M**G**R**G**H**A**R**L **V**H**V**E**P**H**T**E**T** **V**R**K**Y**F**P**E**T**W**I **W**D**L**V**V**V**N**S**A**G  
 751 VAEVGVTPVD TIT~~EWK~~**AGAF** **CL**SEDA**GLGI** **SSTASL**RAFQ **PF**FVELT**MPY**  
 801 **SVIR**GEAFTL KATVNLN**YLPK** CIR**VSVQ**LEA **SPAFLAVP**VE **KE**QAPHCICA  
 851 NGRQTVSWAV TPKSLGNVNF TVSAEALESQ ELCGTEVPSV PEHGRK**DTVI**  
 901 **KPLLVE**PEGL EK**ETTF**N**SLL** CP**SGGEV**SEE LSLK**LPPNVV** EESARASVSV  
 951 LGDILGSAMQ NTQNL**LQMPY** GCGEQNMVLF APNIYVLDYL NETQQLT**PEI**  
 1001 **KSKAIG**YLN**T** GYQRQLNYKH YDGS**YSTFGE** RYGR**NQGN**TW **LTA**FVL**KTF**A  
 1051 QARAYIFIDE AHITQAL**IWL** SQRQK**DNGCF** R**SSG**SLL**NNA** IKGGVEDEVT  
 1101 LSAYIT**IALL** EIPLTVTHPV VR**NALF**C**LES** **AWK**TAQEGDH GSHVY**T**K**ALL**  
 1151 **AYAFAL**AGNQ **DKR**KEVLKSL NEEAVK**KDNS** **VH**WERP**QKPK** APVGHFYEPQ  
 1201 APSAEVEMTS YVLLAYLTAQ PAPT**SED**LTS ATNIVK**WITK** **QQNA**QGG**FSS**  
 1251 **TQDTV**VALHA **LSKY**GAATFT RT**GKAAQ**VTI **QSSG**TFSS**KF** QVDNN**N**RL**LL**  
 1301 **QQVSL**PELPG EYS**MK**VTGEG CVYLQ**T**SLKY **NIL**PEKE**EF**P **FAL**GVQ**T**LPQ  
 1351 **TCDEP**KAHTS **FQIS**LSVSYT **GSR**SAN**MAI** **VD**VKM**VSG**FI **PL**KPT**V**K**M**LE  
 1401 RSNHVS**RTEV** SS**NH**VLIYLD **KVS**NQ**TLSL**F **FT**VLQ**D**VP**V**R DLKPA**I**V**K**VY  
 1451 **DYYET**DEF**AI** **AEYN**AP**CSK**D LGNA

## Excision iii)

Match to: **A2MG\_HUMAN** Score: **179** Expect: **2.5e-14**  
**Alpha-2-macroglobulin OS=Homo sapiens GN=A2M PE=1 SV=3**  
Nominal mass ( $M_r$ ): **164613**; Calculated pI value: **6.03**  
NCBI BLAST search of [A2MG\\_HUMAN](#) against nr  
Unformatted [sequence string](#) for pasting into other applications  
Taxonomy: [Homo sapiens](#)  
Fixed modifications: Carbamidomethyl (C)  
Variable modifications: Oxidation (M)  
Cleavage by Trypsin: cuts C-term side of KR unless next residue is P  
Number of mass values searched: **53**  
Number of mass values matched: **25**  
Sequence Coverage: **29%**

Matched peptides shown in **Bold Red**

```

1 MGKNKLLHPS  LVLLLLVLLP  TDASVSGKPQ  YMVLVPSLLH  TETTEKGCVL
51 LSYLNETVTV  SASLESVRGN  RSLFTDLEAE NDVLHCVAFA VPKSSSNEEV
101 MFLTQVQKGP  TQEFKRTTV  MVKNEDSLVF  VQTDKSIYKP  GQTVKFRVVS
151 MDENFHPLNE LIPLVYIQDP KGNRIAQWQS FQLEGGLKQF SFPLSSEFPQ
201 GSYKVVVQKK SGGRTEHPFT VEEFVLPKFE  VQTVPKIIT  ILEEEMNVSV
251 CGLTYGKPV  PGHVTVSICR  KYSDASDCHG  EDSQAFCEKF  SGQLNSHGCF
301 YQQVKTKVFQ  LKRKEYEMKL  HTEAQIQEEG  TVVELTGRQS  SEITRITIKL
351 SFVKVDShFR  QGIPFFGQVR  LVDGKGVPIP  NKVIFIRGNE  ANYYSNATTD
401 EHGLVQFSIN  TTNVMGTSLT  VRVNYKDRSP  CYGYQWVSEE  HEEAHHTAYL
451 VFSPSKSFVH  LEPMSHELPC  GHTQTVQAHY  ILNGGTLGL  KKLSFYYLIM
501 AKGGIVRTGT  HGLLVKQEDM  KGHFSISIPV  KSDIAPVARL  LIYAVLPTGD
551 VIGDSAKYDV  ENCLANKVDL  SFSPSQSLPA  SHAHLRVTA  PQSVCALRAV
601 DQSVLLMKPD  AELSASSVYN  LLPEKDLTGF  PGPLNDQDNE  DCINRRNVYI
651 NGITYTPVSS  TNEKDMYSFL  EDMGLKAFTN  SKIRKPKMCP  QLQQYEMHGP
701 EGLRVGFYES  DVMGRGHARL  VHVEEPHTET  VRKYFPETWI  WDLVVVNSAG
751 VAEVGVTVPD  TITWKAAGAF  CLSEDAGLGI  SSTASLRAFQ  PFFVELTMPY
801 SVIRGEAFTL  KATVLNLYPK  CIRVSVQLEA  SPAFLAVPVE  KEQAPHCICA
851 NGRQTVSWAV  TPKSLGNVNF  TVSAEALESQ  ELCGTEVPSV  PEHGRKDTVI
901 KPLLVEPEGL  EKETTFNSLL  CPSGGEVSEE  LSLKLPPNVV  EESARASVSV
951 LGDILGSAMQ  NTQNLQMPY  GCGEQNMVLF  APNIYVLDYL  NETQQLTPEI
1001 KSKAIGYLN  GYQRQLNYKH  YDGSYSTFGE  RYGRNQNTW  LTAFVLKTFA
1051 QARAYIFIDE  AHITQALIWL  SQRQKNGCF  RSSGSLNNA  IKGGVEDEV
1101 LSAYITIAL  EIPLTVTHPV  VRNALFCLES  AWKTAQEGDH  GSHVYTKALL
1151 AYAFALAGNQ  DKRKEVLKSL  NEEAVKKNDS  VHWERPQKPK  APVGHFYEPQ
1201 APSAEVEMTS  YVLLAYLTAQ  PAPTSEDLTS  ATNIVKWITK  QQNAQGGFSS
1251 TQDTVVALHA  LSKYGAATFT  RTGKAAQVTI  QSSGTFSSKF  QVDNNNRLLL
1301 QQVSLPELPG  EYSMKVTGEG  CVYLQTSKY  NILPEKEEFP  FALGVQTLPO
1351 TCDEPKAHTS  FQISLSVSYT  GSRSASNMAI  VDKMVSQGI  PLKPTVKMLE
1401 RSNHVSRTTEV  SSNHVLIYLD  KVSNQTLSLF  FTVLQDVPVR  DLKPAIVKVY
1451 DYETDEFAI  AEYNAPCSKD  LGNA

```

### Excision iv)

Match to: **CO3\_HUMAN** Score: **141** Expect: **1.6e-10**  
**Complement C3 OS=Homo sapiens GN=C3 PE=1 SV=2**  
Nominal mass ( $M_r$ ): **188569**; Calculated pI value: **6.02**  
NCBI BLAST search of [CO3\\_HUMAN](#) against nr  
Unformatted [sequence string](#) for pasting into other applications  
Taxonomy: [Homo sapiens](#)  
Fixed modifications: Carbamidomethyl (C)  
Variable modifications: Oxidation (M)  
Cleavage by Trypsin: cuts C-term side of KR unless next residue is P  
Number of mass values searched: **100**  
Number of mass values matched: **37**  
Sequence Coverage: **30%**

Matched peptides shown in **Bold Red**

1 MGPTSGPSLL LLLLTHLPLA LGSPMYSIIT PNILRLESEE TMVLEAHDAQ  
51 GDVPVTVTVH DFPGKLVLS SEKTVLTPAT NHMGNVTFPI PANREFKSEK  
101 GRNKFTVTVQA TFGTQVVEKV **VVLSLQSGYL FIQTDKTIYT** PGSTVLYRIF  
151 TVNHHKLLPVG RTVMVNIENP EGIPVKQDSL SSQNQLGVLP LSWDIPELVN  
201 MGQWKIR**AYY ENSPQQVFST EFEVKEYVLP SFEVIVEPTE** KFYIYNEKG  
251 LEVTITARFL YGK**KVEGTAF VIFGIQDGEQ** RISLPESLKR IPIEDGSSEV  
301 VLSRQVLLDG VQNPRADLV GKSLYVSATV ILHSGSDMVQ AER**SGIPIVT**  
351 **SPYQIHFTKT PKYFKPGMPF DLMVFVTNPD GSPAYRVPVA** VQGEDTVQSL  
401 TQGDGVAKLS **INTHPSQKPL SITVTRTKKQE** LSEAEQATRT **MQUALPYSTVG**  
451 **NSNNYLHLSV LRTELRPGET LNVNFLLRMD RAHEAKIRYY** TYLIMNKGRLL  
501 LKAGRQVREP **GQDLVVLPLS ITTDFIPSPFR LVAYYTLIGA** SQREVVADS  
551 VLDRDVHDSVC GSLVVKSGQS EDRQPVPGQQ MTLKIEGDHG ARVVLLVAVDK  
601 GVFVLNKKNK LTQSKIWDVV EK**ADIGCTPG SGKDYAGVFS** DAGLTFSTSS  
651 **GQQTARQRAEL QCPQPAARRR** RSVQLTEKRM DKVKGYPKEL RKCCEDGMRE  
701 NPMRFSCQRR TRFISLGEAC **KKVFLDCCNY ITELRRQHAR** ASHLGLARSN  
751 **LDEDIAEEN IVSRSEFPES WLWNVEDLKE PPKNGISTKL** MNIFLKDSIT  
801 **TWEILAVSMS DKKGICVADP** FEVTVMQDFE IDLRLPYSVV RNEQVEIRAV  
851 LYNYRQNEQL **KVRVELLHNP AFCSLATTKR** RHQQTVTIPP KSLSLSPYVI  
901 VPLKTGLQEV EVKAAVYHHF ISDGVKSLK VVEGIRMNK TVAVRTLDP  
951 RLGR**EGVQKE DIPPADLSDQ VPDTESETRI LLQGTTPVAQM** TEDAVDAERL  
1001 **KHLIVTPSGC GEQNMIGMTP** TVIAVHYLDE TEQWEKFGLE KRQGALELIK  
1051 KGYTQQLAFR QPSSAFAAFV KRAPSTWLTA YVVKVFLAV NLIAIDSQVL  
1101 CGAVKWLILE **KQKPDGVFQE DAPVIHQEMI GGLRNNNEKD** MALTAFLVIS  
1151 LQEAKDICEE QVNSLPGSIT **KAGDFLEANY MNLQRSTYVA** IAGYALAQMG  
1201 **RLKGPLLNKF LTTAKDKNRW** EDPGKQLYV EATSALLAL LQLKDFDFVP  
1251 PVVRWLNEQR YGGGYGSTQ ATFMVFQALA QYQ**KDAPDHQ ELNLDVSLQL**  
1301 **PSRSSKITHR IHWESASLLR** SEETKENEGF TVTAEGKQG TLSVVTMYHA  
1351 KAKDQLTCNK FDLKVTIKPA PETEKRPQDA KNTMILEICT RYRGDQDATM  
1401 SILDISMMTG FAPDTHDLKQ LANGVDYRIS KYELDKAFSD RNTLIIYLDK  
1451 VSHSEDDCLA **FKVHQYFNVE LIQPGAVKVY AYYNLEESCT** RFYHPEKEDG  
1501 KLNKLCRDEL **CRCAEENCFT QKSDDKVTLE** ERLDKACEPG VDYVYKTRLV  
1551 **KVQLSNDFDE YIMAIQTIK** SGSEDEVQVQ QRTFISPIKC REALKLEEK  
1601 HYLMWGLSSD FWGKPNLSY IIGKDTWVEH WPEEDECQDE ENQKQCQDLG  
1651 AFTESMVVFG CPN

Match to: **CO4A\_HUMAN** Score: 60 Expect: 0.021

**Complement C4-A OS=Homo sapiens GN=C4A PE=1 SV=1**

Nominal mass ( $M_r$ ): 194247; Calculated pI value: 6.65

NCBI BLAST search of [CO4A\\_HUMAN](#) against nr

Unformatted [sequence string](#) for pasting into other applications

Taxonomy: [Homo sapiens](#)

Fixed modifications: Carbamidomethyl (C)

Variable modifications: Oxidation (M)

Cleavage by Trypsin: cuts C-term side of KR unless next residue is P

Number of mass values searched: 100

Number of mass values matched: 22

Sequence Coverage: 20%

Matched peptides shown in **Bold Red**

1 MRLWGLIWA SSFFTLSQLK PRLLLFSPSV VHLGVPLSVG VQLQDVPRGQ  
51 VVKGSVFLRN PSRNNVPCSP KVDFTLSSER **DFALLSLQVP LKDAKSCGLH**  
101 QLLRGPEVQL VAHSPWLKDS LSR**TNIQGI NLLFSSRRGH LFLQTDQPIY**  
151 **NPGQRVRYRV FALDQKMRPS** TDTITVMVEN SHGLRVRKKE VYMPSSIFQD  
201 DFVIPDISEP GTWKISARFS DGLSNSSTQ FEVKKYVLPN FEVKITPGKP  
251 YILTVPGHLD EMQLDIQARY **IYGKPVQGVA YVRFGLLDED** GKKTFFRGL  
301 SQTKLVNGQS HISLSKAEFQ DALEKLNMGITDLQGLRLYV AAALIESPGG  
351 EMEEAELTSW YFVSSPFLSD LSKTKRHLVP **GAPFLQALV** REMSGSPASG  
401 IPVKVSATVS SPGSVPEVQD IQQNTDGSQ VSIPIIIPQT ISELQLSVSA  
451 GSPHPAIARL **TVAAPPSGGP GFLSIERPDS RPPRVGDTLN** LNLRAVGSGA  
501 **TFSHYYMIL SRGQIVFMNR** EPKRTLTSVS VFDHHLAPS FYFVAFYHGH  
551 DHPVANSLRV DVQAGACEGK LELSVDGAKQ YRNGESVKLH LETDSLALVA  
601 LGALDTALYA AGSKSHKPLN MGKVFEAMNS YDLGCGPGG DSALQVFQAA  
651 GLAFSDGDQW TLSRRLSCLP KEKTTRKKRN VNFQKAINLK LGQYASPTAK

701 RCCQDGVTRL PMMRSCEQRA AR**VQQPDCRE** **PFLSCCQFAE** **SLRKKSRDKG**  
 751 QAGLQ**RALEI** **LQEDLIDED** **DIPVRSFFPE** NWLWRVETVD RFQILTLWLP  
 801 DSLTTWEIHG LSLSKTKGLC VATPVQLRVF REFHLHLRLP MSVRRFEQLE  
 851 LRPVLYNYLD KNLTVSVHVS PVEGLCLAGG GGLAQQLVLP AGSARPVAFS  
 901 VVPTAAAVS LKVVARGSF EFPVGDVAVSKV LQIE**KEGAIH** **REELVYELNP**  
 951 **LDHRGR****TLEI** **PGNSDPNMIP** **DGDFNSYVRV** **TASDPLDTLG** **SEGALSPGGV**  
 1001 **ASLLR**LPRGC GEQTMIIYLAP TLAASRYLDK TEQWSTLPPE TKDHAVDLIQ  
 1051 KGYMR**LQQFR** KADGSYAOWL SRDSSTWLTA FVLKVLSLAQ EQVGGSPPEKL  
 1101 QETS**NWLLSQ** QQADGSFQDP CPVLDRSMQG GLVGNDETVA LTAFTVIALH  
 1151 HGLAVFQDEG AEPLKQRVEA SISKANSFLG EKASAGLLGA HAAAITAYAL  
 1201 SLTKAPVDLL GVAHNNLMAM AQETGDNLYW GSVTGSQNSA VSPTPAPRNP  
 1251 SDPMPQAPAL WIETTAYALL HLLLHEG**KA** **MADQASAWLT** **RQGSFQGGFR**  
 1301 **STQDTVIALD** **ALSAYWIASH** **TTEERGLNVT** LSSTGRNGFK SHALQLNNRQ  
 1351 IR**GLEELQF** **SLGSKINVKV** GGNSKGTLKV LRTYNVLDK NTTCQDLQIE  
 1401 VTVKGHVEYT MEANEDYEDY EYDELPAKDD PDAPLQPVTP LQLFEGRNR  
 1451 RRREAPKVV EQUESRVHYTV CIWRNGKVGL SGMIAADVTL LSGFHALLRAD  
 1501 LEKLTSLSDR **YVSHFETEGP** **HVLLYFDSVP** **TSRECVGFEA** VQEVVGLVQ  
 1551 PASATLYDYY NPERRCVYF GAPSKSR**LLA** **TLCSAEVCQC** **AEGKCPQR**  
 1601 ALERGLQDED GYRMKFACY PRVEYGFQVK VLREDSRAAF RLFETKITQV  
 1651 LHFTKDVKAA ANQMRNFLVR ASCRLRLEPG KEYLIMGLDG ATYDLEGHPO  
 1701 YLLDSNSWIE EMPSERLCRS TRQR**ACAQL** **NDFLQEYGTQ** **GCQV**

Match to: **CO4B\_HUMAN** Score: **68** Expect: **0.0036**

**Complement C4-B OS=Homo sapiens GN=C4B PE=1 SV=1**

Nominal mass ( $M_r$ ): **194212**; Calculated pI value: **6.73**

NCBI BLAST search of [CO4B\\_HUMAN](#) against nr

Unformatted [sequence string](#) for pasting into other applications

Taxonomy: [Homo sapiens](#)

Fixed modifications: Carbamidomethyl (C)

Variable modifications: Oxidation (M)

Cleavage by Trypsin: cuts C-term side of KR unless next residue is P

Number of mass values searched: **100**

Number of mass values matched: **23**

Sequence Coverage: **21%**

Matched peptides shown in **Bold Red**

1 MRLLLWGLIWA SSFFTL**SLQK** PRLLLFSPSV VHLGVPLSVG VQLQDVPRGQ  
 51 VVKGSVFLRN PSRNNVPCSP KVDFTLSSER **DFALLSLQVP** **LKDAK**SCGLH  
 101 QLLRGPEVQL VAHSPWLKDS LSRT**TNIQGI** **NLLFSSRRGH** **LFLQTDQPIY**  
 151 **NPGQVRVYRV** FALDQKMRPS TDTITVMVEN SHGLRVRKKE VYMPSSIFQD  
 201 DFVIPDISEP GTWKISARFS DGLESNSSTQ FEVKKYVLPN FEVKITPKKP  
 251 YILTPVPHLD EMQLDIQAR**Y** **IYGKPVQGVA** **YVRFGLLDED** GKKTFFRGLE  
 301 SQTKLNGQS HISLSKAEFQ DALEKLNMGITDLQGLRLYV AAAIIESPGG  
 351 EMEEAELTSW YFVSSPFFSLD LSKTKRHLVP **GAPFLQALV** REMSGSPASG  
 401 IPVKVSATVS SPGSVPEVQD IQQNTDGGSGQ VSIPIIIIPQT ISELQLSVSA  
 451 GSPHPAIARL **TVAAPPSGGP** **GFLSIERPDS** **RPPRVGDTLN** LNLRAVGSGA  
 501 **TFSHYYMIL** SRGQIVFMNR EPKRTLTSVS VFVDHHLAPS FYFVAFYYHG  
 551 DHPVANSLRV DVQAGACEGK LELSVDGAKQ YRNGESVKLH LETDSLALVA  
 601 LGALDTALYA AGSKSHKPLN MGKVFEAMNS YDLGCGPGGG DSALQVFQAA  
 651 GLAFSDGDQW TLSRKRRLSCP KEKTRKKRN VNFQKAIN EK LGQYASPTAK  
 701 RCCQDGVTRL PMMRSCEQRA AR**VQQPDCRE** **PFLSCCQFAE** **SLRKKSRDKG**  
 751 QAGLQ**RALEI** **LQEDLIDED** **DIPVRSFFPE** NWLWRVETVD RFQILTLWLP  
 801 DSLTTWEIHG LSLSKTKGLC VATPVQLRVF REFHLHLRLP MSVRRFEQLE  
 851 LRPVLYNYLD KNLTVSVHVS PVEGLCLAGG GGLAQQLVLP AGSARPVAFS  
 901 VVPTAAAVS LKVVARGSF EFPVGDVAVSKV LQIE**KEGAIH** **REELVYELNP**  
 951 **LDHRGR****TLEI** **PGNSDPNMIP** **DGDFNSYVRV** **TASDPLDTLG** **SEGALSPGGV**  
 1001 **ASLLR**LPRGC GEQTMIIYLAP TLAASRYLDK TEQWSTLPPE TKDHAVDLIQ  
 1051 KGYMR**LQQFR** KADGSYAOWL SRDSSTWLTA FVLKVLSLAQ EQVGGSPPEKL  
 1101 QETS**NWLLSQ** QQADGSFQDL **SPVIHRSMQG** GLVGNDETVA LTAFTVIALH  
 1151 HGLAVFQDEG AEPLKQRVEA SISKANSFLG EKASAGLLGA HAAAITAYAL  
 1201 SLTKAPVDLL GVAHNNLMAM AQETGDNLYW GSVTGSQNSA VSPTPAPRNP  
 1251 SDPMPQAPAL WIETTAYALL HLLLHEG**KA** **MADQASAWLT** **RQGSFQGGFR**  
 1301 **STQDTVIALD** **ALSAYWIASH** **TTEERGLNVT** LSSTGRNGFK SHALQLNNRQ  
 1351 IR**GLEELQF** **SLGSKINVKV** GGNSKGTLKV LRTYNVLDK NTTCQDLQIE  
 1401 VTVKGHVEYT MEANEDYEDY EYDELPAKDD PDAPLQPVTP LQLFEGRNR  
 1451 RRREAPKVV EQUESRVHYTV CIWRNGKVGL SGMIAADVTL LSGFHALLRAD  
 1501 LEKLTSLSDR **YVSHFETEGP** **HVLLYFDSVP** **TSRECVGFEA** VQEVVGLVQ

1551 PASATLYDYY NPERRCVVFY GAPSKSRLLA **TLCSAEVCQC** **AEGK**CPRQRR  
 1601 ALERGLQDED GYRMKFACY Y PRVEYGFQVK VLREDSRAAF RLFETKITQV  
 1651 LHFTKDVKAA ANQMRNFLVR ASCRLRLEPG KEYLIMGLDG ATYDLEGHPO  
 1701 YLLDSNSWIE EMPSERLCRS TRQRAACAQL **NDFLQEYGTQ** **GCQV**

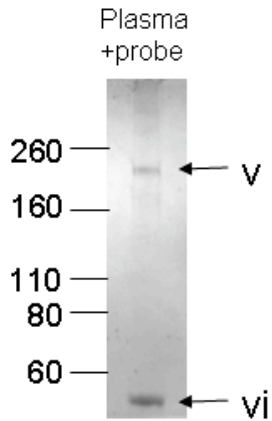

### Excision vi)

Match to: **ALBU\_HUMAN** Score: 153 Expect: 1e-11  
**Serum albumin OS=Homo sapiens GN=ALB PE=1 SV=2**  
 Nominal mass ( $M_r$ ): 71317; Calculated pI value: 5.92  
 NCBI BLAST search of [ALBU\\_HUMAN](#) against nr  
 Unformatted [sequence string](#) for pasting into other applications  
 Taxonomy: [Homo sapiens](#)  
 Fixed modifications: Carbamidomethyl (C)  
 Variable modifications: Oxidation (M)  
 Cleavage by Trypsin: cuts C-term side of KR unless next residue is P  
 Number of mass values searched: 79  
 Number of mass values matched: 21  
 Sequence Coverage: 47%

Matched peptides shown in **Bold Red**

1 MKWVTFISLL FLFSSAYSRG VFRDAHKSE VAHRFKDLGE ENFK**ALV**LIA  
 51 **FAQYLQ**CPF **EDHV**KLNVN TEFAKTCVAD ESAENC**DKSL** **HTLFGDKLCT**  
 101 **VATLR**ETIGE MADCCAQEP ERNECFLOHK DDNP**NLPRLV** **RPEVDVMCTA**  
 151 **FHDNEETFLK** **KYL**EIARRH **PYFYAPELLF** **FAKRYKAAFT** **ECCQAADKAA**  
 201 **CLLPK**LDELRL DEGKASSAQ RLK**CASLQKF** GERAFKAWAV ARLSQRFPKA  
 251 EFAEVSKLVT DLTK**VHTECC** **HGDLL**ECADD **RADLAKYICE** NQDSISSKLLK  
 301 ECCEKPLLEK **SHCIAEVEND** **EMPADLPSLA** **ADFVESKDVC** **KNYAEAKDVF**  
 351 **LGMFLY**EAR RHPDYSV**VLL** **LRLAKTYETT** LEKCCAAADP HECYAK**VFDE**  
 401 **FKPLV**E**EPQN** **LIKQNC**ELFE **QLGEYKFQNA** **LLVRYTKKVP** **QVSTPTLVEV**  
 451 **SRNLG**KVGSK CCKHPEAK**RM** **PCAEDYLSVV** **LNQLCVLHEK** TPVSDRVTKC  
 501 CTESLVNRRP **CFSAL**EVDET **YVPKEFNAET** **FTFHADICTL** **SEKERQIKKQ**  
 551 TALVELVKHK PKATKEQLKA VMDDFAAFVE KCKKADDKET CFAE**E**GKLLV  
 601 AASQAALGL
